# Supplementary material for: Physical activity moderates the deleterious relationship between cardiovascular disease, or its risk factors, and quality of life: Findings from two population-based cohort studies in Southern Brazil and South Australia
Source: PubMed Central journal article supplement (PMC5991645; doi:10.1371/journal.pone.0198769), 2018-06-07
Supplement: pone.0198769.s003.pdf [file pone.0198769.s003.pdf]

**Supplementary Table S1.** Comparison of the sample characteristics between the baseline and the last follow-up in the EpiFloripa study (2012-2013) and NWAHS (2008-2009).

|                                                          | EPIFLORIPA                       |                                    | NWAHS                               |                                       |
|----------------------------------------------------------|----------------------------------|------------------------------------|-------------------------------------|---------------------------------------|
|                                                          | Included in<br>2009<br>(N=1,720) | Evaluated in<br>2012*<br>(n=1,222) | Included in<br>2000-03<br>(N=4,060) | Evaluated in<br>2008-10*<br>(n=2,871) |
| <b>Baseline characteristics</b>                          |                                  |                                    |                                     |                                       |
| Gender (males) - %                                       | 48.4                             | 48.2                               | 49.1                                | 48.4                                  |
| Age (years) - Mean±SD                                    | 37.1±11.3                        | 36.0±12.0                          | 44.9±18.2                           | 42.8±16.7                             |
| Marital status<br>(married or living with a partner) - % | 60.4                             | 57.1                               | 62.2                                | 64.1                                  |
| Educational level (up to secondary) - %                  | 55.8                             | 55.4                               | 43.1                                | 41.6                                  |
| Obesity†                                                 | 15.7                             | 15.5                               | 27.0                                | 25.7                                  |

SD = standard deviation

\* Comparison considering baseline characteristics of each sample and using the respective sampling weights

† Obesity = body mass index  $\geq 30.0$  kg/m<sup>2</sup>
